# Supplementary material for: Inter-model comparison of global hydroxyl radical (OH) distributions and their impact on atmospheric methane over the 2000–2016 period
Source: Copernicus journal article supplement (doi:10.5194/acp-2019-281), 2019-04-01
Supplement: Supplementary file 1 [file acp-2019-281-supplement.pdf]

## Supplement of

# Inter-model comparison of global hydroxyl radical (OH) distributions and their impact on atmospheric methane over the 2000-2016 period

Yuanhong Zhao, et al.

Correspondence to: Yuanhong Zhao (yuanhong.zhao@lsce.ipsl.fr)

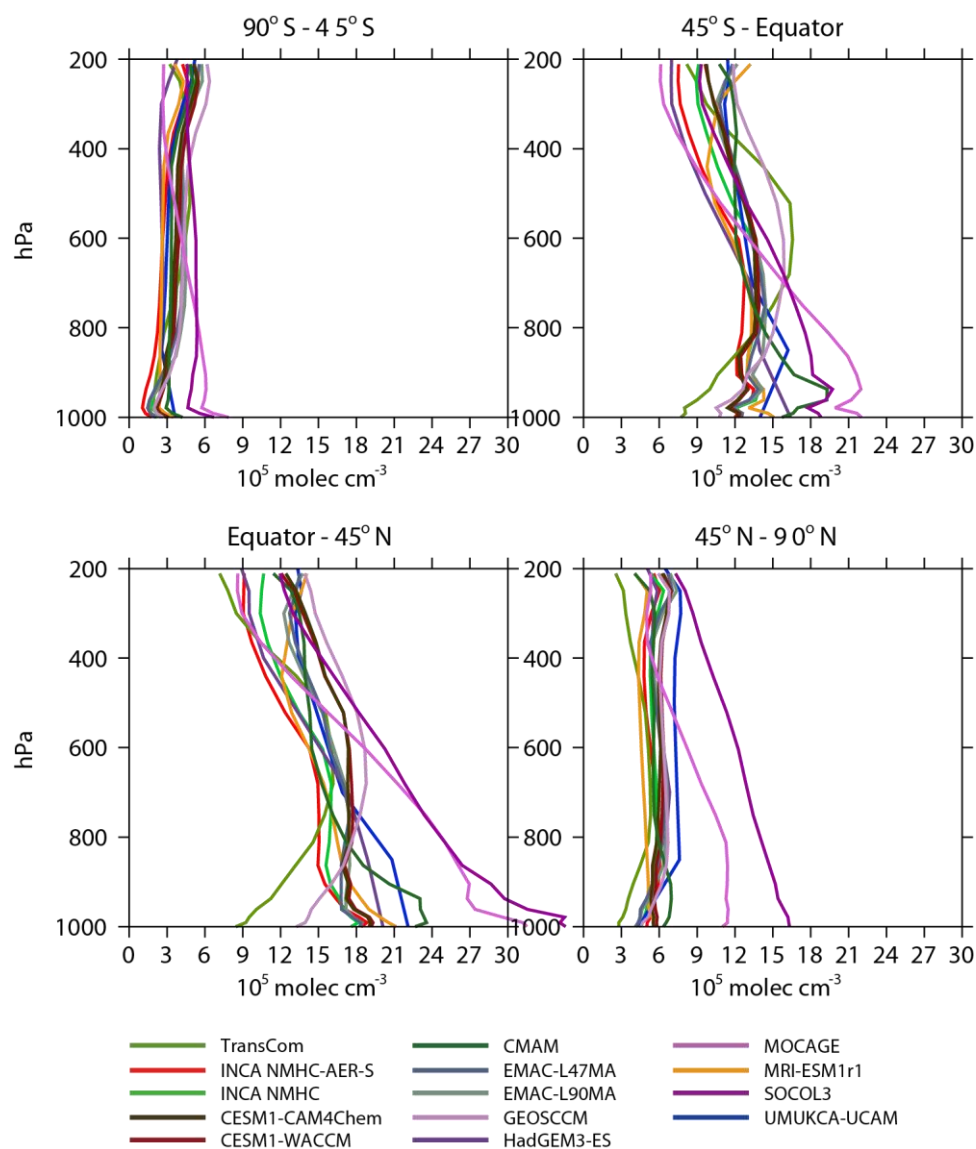

**Figure S1.** Vertical distribution of [OH] averaged over four latitude bands and over the years 2000 to 2010.

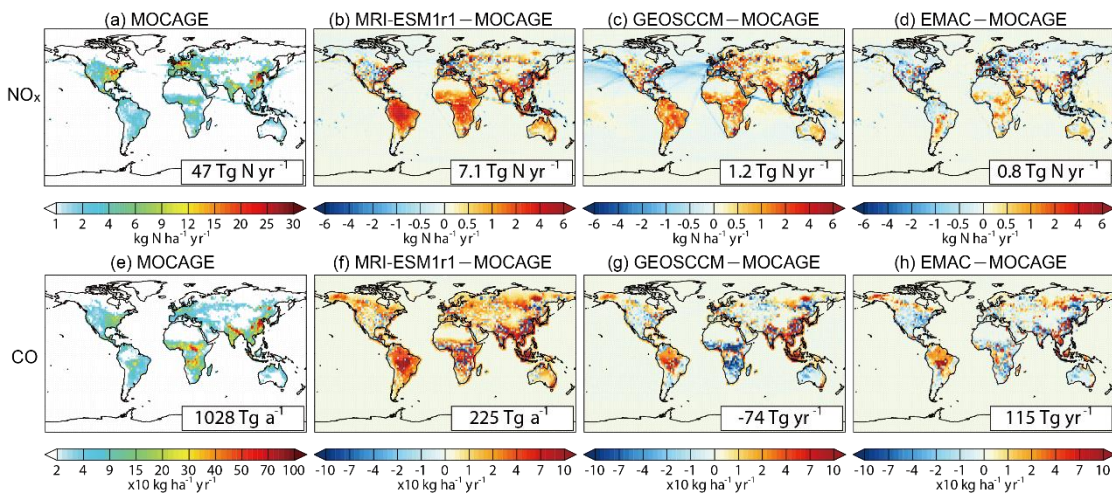

**Figure S2.** Spatial distributions of  $\text{NO}_x$  and CO emissions inputted to MOCAGE (a, e) REF-C1 experiments averaged from 2000 to 2009 and differences of MOCAGE with MRI-ESM1r1 (b, f), GEOSCCM(c, g) and EMAC (d, h).
